# Supplementary material
Source: PubMed Central journal article supplement (PMC6732014)
Supplement: NIHMS1527557-supplement-1.pdf [file NIHMS1527557-supplement-1.pdf]

Condition \_\_\_\_ No App \_\_\_\_

**Mental Demand**

How mentally demanding was the case with use of *The Harriet Lane Handbook*?

|   |   |   |   |   |   |   |   |   |    |    |    |    |    |    |    |    |    |    |    |    |
|---|---|---|---|---|---|---|---|---|----|----|----|----|----|----|----|----|----|----|----|----|
| 1 | 2 | 3 | 4 | 5 | 6 | 7 | 8 | 9 | 10 | 11 | 12 | 13 | 14 | 15 | 16 | 17 | 18 | 19 | 20 | 21 |
|---|---|---|---|---|---|---|---|---|----|----|----|----|----|----|----|----|----|----|----|----|

Very Low

Very High

**Physical Demand**

How physically demanding was the case with use of *The Harriet Lane Handbook*?

|   |   |   |   |   |   |   |   |   |    |    |    |    |    |    |    |    |    |    |    |    |
|---|---|---|---|---|---|---|---|---|----|----|----|----|----|----|----|----|----|----|----|----|
| 1 | 2 | 3 | 4 | 5 | 6 | 7 | 8 | 9 | 10 | 11 | 12 | 13 | 14 | 15 | 16 | 17 | 18 | 19 | 20 | 21 |
|---|---|---|---|---|---|---|---|---|----|----|----|----|----|----|----|----|----|----|----|----|

Very Low

Very High

**Temporal Demand**

How hurried or rushed was the pace of the case with use of *The Harriet Lane Handbook*?

|   |   |   |   |   |   |   |   |   |    |    |    |    |    |    |    |    |    |    |    |    |
|---|---|---|---|---|---|---|---|---|----|----|----|----|----|----|----|----|----|----|----|----|
| 1 | 2 | 3 | 4 | 5 | 6 | 7 | 8 | 9 | 10 | 11 | 12 | 13 | 14 | 15 | 16 | 17 | 18 | 19 | 20 | 21 |
|---|---|---|---|---|---|---|---|---|----|----|----|----|----|----|----|----|----|----|----|----|

Very Low

Very High

**Performance**

How successful were you in accomplishing what you were asked to do?

|   |   |   |   |   |   |   |   |   |    |    |    |    |    |    |    |    |    |    |    |    |
|---|---|---|---|---|---|---|---|---|----|----|----|----|----|----|----|----|----|----|----|----|
| 1 | 2 | 3 | 4 | 5 | 6 | 7 | 8 | 9 | 10 | 11 | 12 | 13 | 14 | 15 | 16 | 17 | 18 | 19 | 20 | 21 |
|---|---|---|---|---|---|---|---|---|----|----|----|----|----|----|----|----|----|----|----|----|

Perfect

Failure

**Effort**

How hard did you have to work to accomplish your level of performance?

|   |   |   |   |   |   |   |   |   |    |    |    |    |    |    |    |    |    |    |    |    |
|---|---|---|---|---|---|---|---|---|----|----|----|----|----|----|----|----|----|----|----|----|
| 1 | 2 | 3 | 4 | 5 | 6 | 7 | 8 | 9 | 10 | 11 | 12 | 13 | 14 | 15 | 16 | 17 | 18 | 19 | 20 | 21 |
|---|---|---|---|---|---|---|---|---|----|----|----|----|----|----|----|----|----|----|----|----|

Very Low

Very High

**Frustration**

How insecure, discouraged, irritated, stressed, and annoyed were you?

|   |   |   |   |   |   |   |   |   |    |    |    |    |    |    |    |    |    |    |    |    |
|---|---|---|---|---|---|---|---|---|----|----|----|----|----|----|----|----|----|----|----|----|
| 1 | 2 | 3 | 4 | 5 | 6 | 7 | 8 | 9 | 10 | 11 | 12 | 13 | 14 | 15 | 16 | 17 | 18 | 19 | 20 | 21 |
|---|---|---|---|---|---|---|---|---|----|----|----|----|----|----|----|----|----|----|----|----|

Very Low

Very High

Supplementary Figure 1. NASA-TLX provided after case performed without ECDS tool.<sup>32</sup>

Condition \_\_\_\_\_ +App\_\_\_\_\_

**Mental Demand**

How mentally demanding was the case with use of the app?

|   |   |   |   |   |   |   |   |   |    |    |    |    |    |    |    |    |    |    |    |    |
|---|---|---|---|---|---|---|---|---|----|----|----|----|----|----|----|----|----|----|----|----|
| 1 | 2 | 3 | 4 | 5 | 6 | 7 | 8 | 9 | 10 | 11 | 12 | 13 | 14 | 15 | 16 | 17 | 18 | 19 | 20 | 21 |
|---|---|---|---|---|---|---|---|---|----|----|----|----|----|----|----|----|----|----|----|----|

Very Low

Very High

**Physical Demand**

How physically demanding was the case with use of the app?

|   |   |   |   |   |   |   |   |   |    |    |    |    |    |    |    |    |    |    |    |    |
|---|---|---|---|---|---|---|---|---|----|----|----|----|----|----|----|----|----|----|----|----|
| 1 | 2 | 3 | 4 | 5 | 6 | 7 | 8 | 9 | 10 | 11 | 12 | 13 | 14 | 15 | 16 | 17 | 18 | 19 | 20 | 21 |
|---|---|---|---|---|---|---|---|---|----|----|----|----|----|----|----|----|----|----|----|----|

Very Low

Very High

**Temporal Demand**

How hurried or rushed was the pace of the case with use of the app?

|   |   |   |   |   |   |   |   |   |    |    |    |    |    |    |    |    |    |    |    |    |
|---|---|---|---|---|---|---|---|---|----|----|----|----|----|----|----|----|----|----|----|----|
| 1 | 2 | 3 | 4 | 5 | 6 | 7 | 8 | 9 | 10 | 11 | 12 | 13 | 14 | 15 | 16 | 17 | 18 | 19 | 20 | 21 |
|---|---|---|---|---|---|---|---|---|----|----|----|----|----|----|----|----|----|----|----|----|

Very Low

Very High

**Performance**

How successful were you in accomplishing what you were asked to do?

|   |   |   |   |   |   |   |   |   |    |    |    |    |    |    |    |    |    |    |    |    |
|---|---|---|---|---|---|---|---|---|----|----|----|----|----|----|----|----|----|----|----|----|
| 1 | 2 | 3 | 4 | 5 | 6 | 7 | 8 | 9 | 10 | 11 | 12 | 13 | 14 | 15 | 16 | 17 | 18 | 19 | 20 | 21 |
|---|---|---|---|---|---|---|---|---|----|----|----|----|----|----|----|----|----|----|----|----|

Perfect

Failure

**Effort**

How hard did you have to work to accomplish your level of performance?

|   |   |   |   |   |   |   |   |   |    |    |    |    |    |    |    |    |    |    |    |    |
|---|---|---|---|---|---|---|---|---|----|----|----|----|----|----|----|----|----|----|----|----|
| 1 | 2 | 3 | 4 | 5 | 6 | 7 | 8 | 9 | 10 | 11 | 12 | 13 | 14 | 15 | 16 | 17 | 18 | 19 | 20 | 21 |
|---|---|---|---|---|---|---|---|---|----|----|----|----|----|----|----|----|----|----|----|----|

Very Low

Very High

**Frustration**

How insecure, discouraged, irritated, stressed, and annoyed were you?

|   |   |   |   |   |   |   |   |   |    |    |    |    |    |    |    |    |    |    |    |    |
|---|---|---|---|---|---|---|---|---|----|----|----|----|----|----|----|----|----|----|----|----|
| 1 | 2 | 3 | 4 | 5 | 6 | 7 | 8 | 9 | 10 | 11 | 12 | 13 | 14 | 15 | 16 | 17 | 18 | 19 | 20 | 21 |
|---|---|---|---|---|---|---|---|---|----|----|----|----|----|----|----|----|----|----|----|----|

Very Low

Very High

Supplementary Figure 2. NASA-TLX provided after case performed with use of ECDS tool.<sup>32</sup>

**System Usability Scale (SUS)**

|                                                                                                  | Strongly<br>disagree |   |   |   | Strongly<br>agree |
|--------------------------------------------------------------------------------------------------|----------------------|---|---|---|-------------------|
| 1. I think that I would like to <u>use</u> this app frequently                                   | 1                    | 2 | 3 | 4 | 5                 |
| 2. I found this app unnecessarily complex                                                        | 1                    | 2 | 3 | 4 | 5                 |
| 3. I thought this app was easy to use                                                            | 1                    | 2 | 3 | 4 | 5                 |
| 4. I think that I would need the support of a technical person to <u>be able</u> to use this app | 1                    | 2 | 3 | 4 | 5                 |
| 5. I found the various app functions were <u>well</u> integrated                                 | 1                    | 2 | 3 | 4 | 5                 |
| 6. I thought there was too much <u>inconsistency</u> within this app                             | 1                    | 2 | 3 | 4 | 5                 |
| 7. I imagine that most people <u>would</u> learn to use this app <u>very</u> quickly             | 1                    | 2 | 3 | 4 | 5                 |
| 8. I found this app very <u>awkward</u> to use                                                   | 1                    | 2 | 3 | 4 | 5                 |
| 9. I felt very confident using the <u>app</u>                                                    | 1                    | 2 | 3 | 4 | 5                 |
| 10. I needed to learn a lot of things before I could get going <u>with</u> the app               | 1                    | 2 | 3 | 4 | 5                 |

Supplementary Figure 3. System Usability Scale.<sup>36</sup>

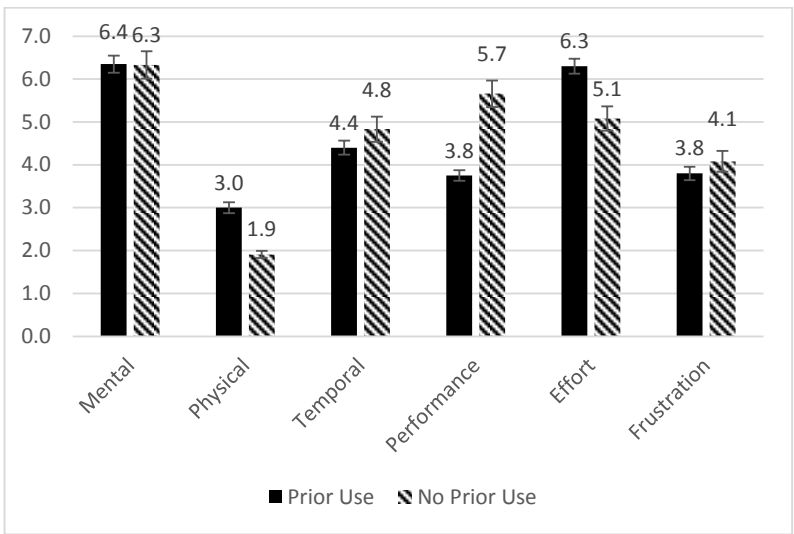

Supplementary Figure 4. NASA-TLX scores with and without prior use of PedsGuide on the case where ECDS was used. Bars indicate standard error.

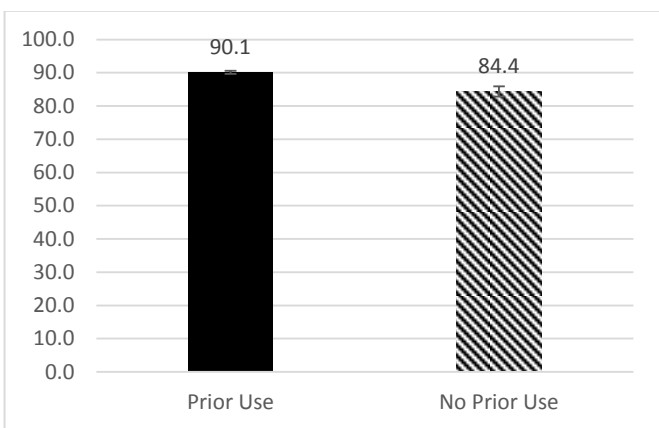

Supplementary Figure 5. Score on SUS with and without prior use of PedsGuide. Bars indicate standard error.
